# Supplementary material for: Synthesis and thermoresponsive properties of four-arm star-shaped poly(N-isopropylacrylamide)s bearing covalent and non-covalent cores
Source: Royal Society of Chemistry journal article supplement (doi:10.1039/c5py00277j), 2015-01-01
Supplement: c5py00277j1.pdf [file c5py00277j1.pdf]

## *Supporting Information*

### **Synthesis and Thermoresponsive Property of Four-Arm Star-Shaped Poly(*N*-isopropylacrylamide)s Bearing Covalent and Non-Covalent Cores**

*Yougen Chen,<sup>§</sup> Nao Xiao,<sup>†</sup> Moe Fukuoka,<sup>‡</sup> Kohei Yoshida,<sup>‡</sup> Qian Duan,<sup>¶</sup> Toshifumi Satoh,<sup>‡</sup> Toyoji Kakuchi<sup>§‡\*</sup>*

*<sup>§</sup> Frontier Chemistry Center, Faculty of Engineering, Hokkaido University, Sapporo, 060-8628, Japan.*

*<sup>†</sup> School of Chemical Biology and Pharmaceutical Sciences, Capital Medical University, No. 10, You'an Men, Waixi Toutiao, Beijing, 100069, China.*

*<sup>‡</sup> Division of Biotechnology and Macromolecular Chemistry, Faculty of Engineering, Hokkaido University, Sapporo, 060-8628, Japan.*

*<sup>¶</sup> School of Materials Science and Engineering, Changchun University of Science and Technology, Changchun 130022, China*

*Corresponding authors: [kakuchi@poly-bm.eng.hokudai.ac](mailto:kakuchi@poly-bm.eng.hokudai.ac)*

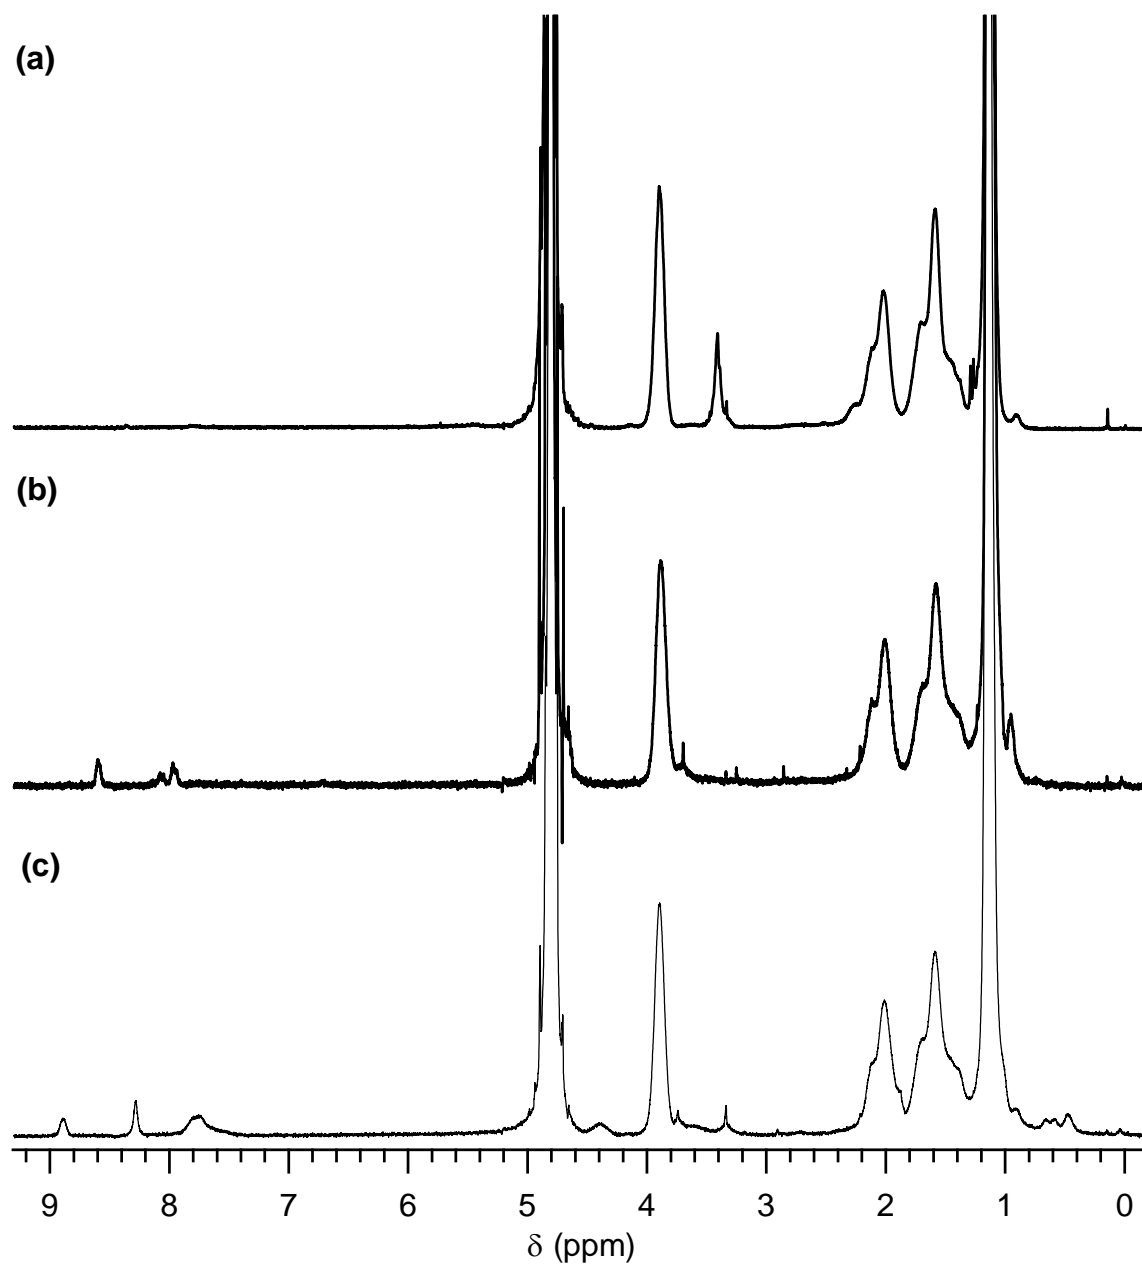

**Figure S1.**  $^1\text{H}$  NMR spectra of (a) **1a**, (b) **4a**, and (c) **5a** in  $\text{CDCl}_3$ .

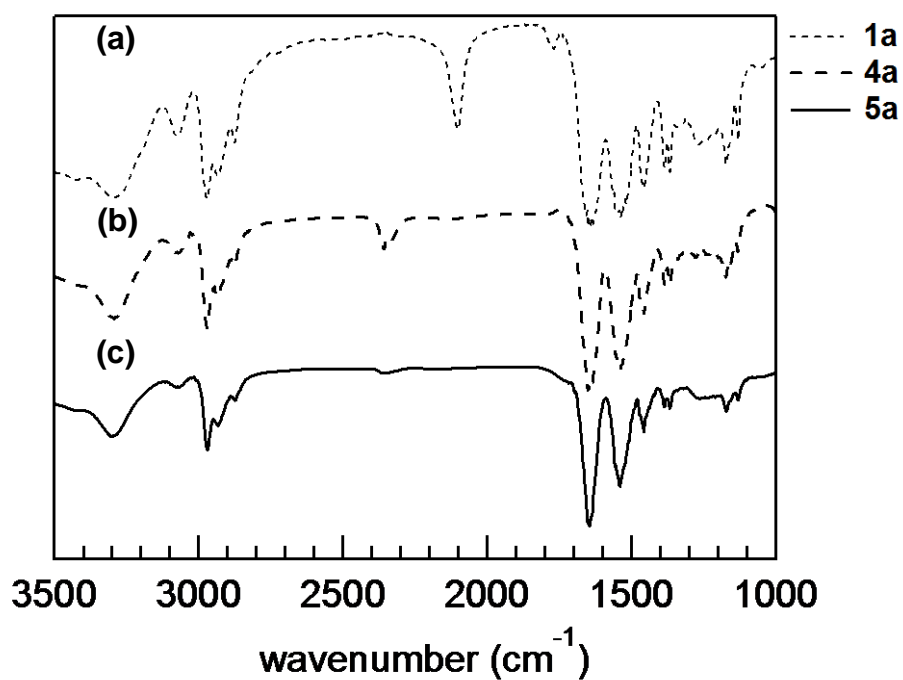

**Figure S2.** FT-IR spectra of (a) **1a**, (b) **4a**, and (c) **5a**.

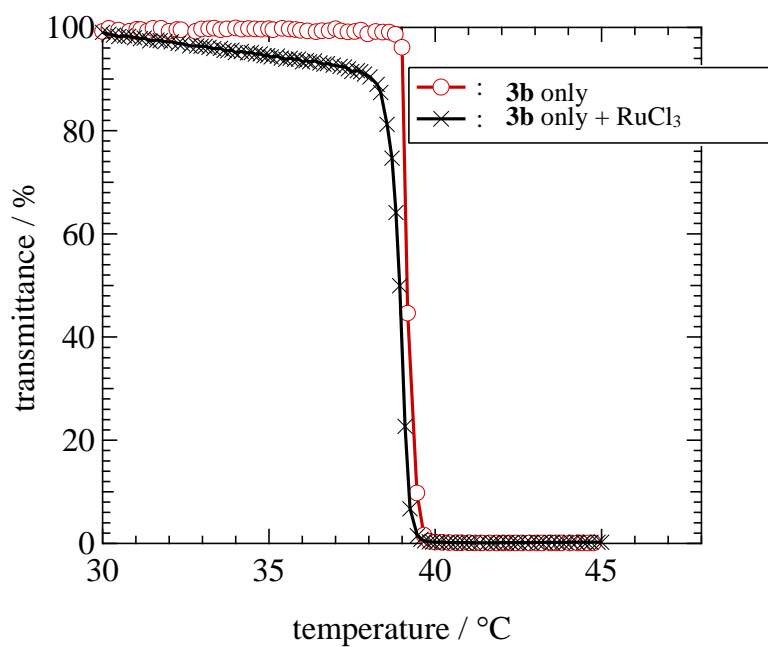

**Figure S3.** Temperature dependence of optical transmittance at 500 nm obtained for 2 mg mL<sup>-1</sup> aqueous solution of **3b** before (red) and after (black) adding RuCl<sub>3</sub>.
